# Supplementary material for: Primary tumor side is associated with prognosis of colorectal cancer patients with brain metastases
Source: PubMed Central journal article supplement — ESMO Open. 2021 Jun 4;6(3):100168. doi: 10.1016/j.esmoop.2021.100168 (PMC8190486; doi:10.1016/j.esmoop.2021.100168), 2021-06-04
Supplement: mmc1.pdf [file mmc1.pdf]

## 323 mCRC ptx with BM

ptx excluded due to incomplete data on the clinical course of disease

7

ptx excluded due to incomplete information regarding PTS

10

ptx excluded due to second primary tumor

12

## 294 mCRC ptx with BM

ptx excluded due to non-exact localization of primary tumor in transverse colon

13

## 281 mCRC ptx with BM

239 ptx (85.1%)  
left-sided mCRC with BM

42 ptx (14.9%)  
right-sided mCRC with BM
